# Supplementary material for: Protecting the global ocean for biodiversity, food and climate
Source: Springer Nature journal article supplement (doi:10.1038/s41586-021-03371-z), 2021-03-17
Supplement: 41586_2021_3371_MOESM2_ESM.pdf [file 41586_2021_3371_MOESM2_ESM.pdf]

## Reporting Summary

Nature Research wishes to improve the reproducibility of the work that we publish. This form provides structure for consistency and transparency in reporting. For further information on Nature Research policies, see [Authors & Referees](#) and the [Editorial Policy Checklist](#).

### Statistics

For all statistical analyses, confirm that the following items are present in the figure legend, table legend, main text, or Methods section.

- |     |           |
|-----|-----------|
| n/a | Confirmed |
|-----|-----------|
- The exact sample size ( $n$ ) for each experimental group/condition, given as a discrete number and unit of measurement
  - A statement on whether measurements were taken from distinct samples or whether the same sample was measured repeatedly
  - The statistical test(s) used AND whether they are one- or two-sided  
*Only common tests should be described solely by name; describe more complex techniques in the Methods section.*
  - A description of all covariates tested
  - A description of any assumptions or corrections, such as tests of normality and adjustment for multiple comparisons
  - A full description of the statistical parameters including central tendency (e.g. means) or other basic estimates (e.g. regression coefficient) AND variation (e.g. standard deviation) or associated estimates of uncertainty (e.g. confidence intervals)
  - For null hypothesis testing, the test statistic (e.g.  $F$ ,  $t$ ,  $r$ ) with confidence intervals, effect sizes, degrees of freedom and  $P$  value noted  
*Give  $P$  values as exact values whenever suitable.*
  - For Bayesian analysis, information on the choice of priors and Markov chain Monte Carlo settings
  - For hierarchical and complex designs, identification of the appropriate level for tests and full reporting of outcomes
  - Estimates of effect sizes (e.g. Cohen's  $d$ , Pearson's  $r$ ), indicating how they were calculated

*Our web collection on [statistics for biologists](#) contains articles on many of the points above.*

### Software and code

Policy information about [availability of computer code](#)

Data collection No software was used to collect data in this study. All data came from different existing sources listed in the Methods section.

Data analysis All data processing was done in R using the following libraries: rgdal version 1.5-19, raster version 3.4-5, sf version 0.9-6, tidyverse version 1.3.0, funrar version 1.4.1, picante version 1.8.2  
The R code that supports the findings of this study is available at <https://github.com/emlab-ucsb/ocean-conservation-priorities>

For manuscripts utilizing custom algorithms or software that are central to the research but not yet described in published literature, software must be made available to editors/reviewers. We strongly encourage code deposition in a community repository (e.g. GitHub). See the Nature Research [guidelines for submitting code & software](#) for further information.

### Data

Policy information about [availability of data](#)

All manuscripts must include a [data availability statement](#). This statement should provide the following information, where applicable:

- Accession codes, unique identifiers, or web links for publicly available datasets
- A list of figures that have associated raw data
- A description of any restrictions on data availability

The underlying data used in this study are available from the sources listed in the Supplemental Information.

## Field-specific reporting

Please select the one below that is the best fit for your research. If you are not sure, read the appropriate sections before making your selection.

Life sciences       Behavioural & social sciences       Ecological, evolutionary & environmental sciences

For a reference copy of the document with all sections, see [nature.com/documents/nr-reporting-summary-flat.pdf](https://www.nature.com/documents/nr-reporting-summary-flat.pdf)

## Ecological, evolutionary & environmental sciences study design

All studies must disclose on these points even when the disclosure is negative.

|                                   |                                                                                                                                                                                                                                                                                                                                                                                                         |
|-----------------------------------|---------------------------------------------------------------------------------------------------------------------------------------------------------------------------------------------------------------------------------------------------------------------------------------------------------------------------------------------------------------------------------------------------------|
| Study description                 | We collected global data on ocean biodiversity, fisheries, and sediment carbon stocks, and conducted prioritization analyses to identify a global system of marine protected areas that achieve multiple objectives.                                                                                                                                                                                    |
| Research sample                   | We used data on:<br>Fisheries - RAM Legacy Database, Global Fishing Watch<br>Ocean Biodiversity - IUCN Red List, Aquamaps, BirdLife International Seabird Database, Clark's Global Seamount Classification, Spalding's Marine Ecoregions and Pelagic Provinces Classification<br>Marine Protected Areas - Atlas of Marine Protection<br>Carbon - Atwood et al. (Frontiers of Marine Science, 2020, 7:1) |
| Sampling strategy                 | This is a modeling study using available data. We used all available databases that contained reliable global data and which allowed us to conduct our prioritisation analyses,.                                                                                                                                                                                                                        |
| Data collection                   | Data were obtained from online repositories and directly from colleagues.                                                                                                                                                                                                                                                                                                                               |
| Timing and spatial scale          | We used the most recent databases, thus our data range from 2006 (marine ecoregion classification) to 2020.                                                                                                                                                                                                                                                                                             |
| Data exclusions                   | No data were excluded from our modeling study.                                                                                                                                                                                                                                                                                                                                                          |
| Reproducibility                   | N/A - No experiments were performed                                                                                                                                                                                                                                                                                                                                                                     |
| Randomization                     | N/A - No experiments were performed                                                                                                                                                                                                                                                                                                                                                                     |
| Blinding                          | Blinding does not apply because this is a modeling study not involving experimental subjects.                                                                                                                                                                                                                                                                                                           |
| Did the study involve field work? | <input type="checkbox"/> Yes <input checked="" type="checkbox"/> No                                                                                                                                                                                                                                                                                                                                     |

## Reporting for specific materials, systems and methods

We require information from authors about some types of materials, experimental systems and methods used in many studies. Here, indicate whether each material, system or method listed is relevant to your study. If you are not sure if a list item applies to your research, read the appropriate section before selecting a response.

### Materials & experimental systems

| n/a                                 | Involvement in the study                             |
|-------------------------------------|------------------------------------------------------|
| <input checked="" type="checkbox"/> | <input type="checkbox"/> Antibodies                  |
| <input checked="" type="checkbox"/> | <input type="checkbox"/> Eukaryotic cell lines       |
| <input checked="" type="checkbox"/> | <input type="checkbox"/> Palaeontology               |
| <input checked="" type="checkbox"/> | <input type="checkbox"/> Animals and other organisms |
| <input checked="" type="checkbox"/> | <input type="checkbox"/> Human research participants |
| <input checked="" type="checkbox"/> | <input type="checkbox"/> Clinical data               |

### Methods

| n/a                                 | Involvement in the study                        |
|-------------------------------------|-------------------------------------------------|
| <input checked="" type="checkbox"/> | <input type="checkbox"/> ChIP-seq               |
| <input checked="" type="checkbox"/> | <input type="checkbox"/> Flow cytometry         |
| <input checked="" type="checkbox"/> | <input type="checkbox"/> MRI-based neuroimaging |
